# Supplementary material for: Feasibility of progressive sit-to-stand training among older hospitalized patients
Source: PeerJ. 2015 Dec 17;3:e1500. doi: 10.7717/peerj.1500 (PMC4690357; doi:10.7717/peerj.1500)
Supplement: Supplemental Information 1 [file peerj-03-1500-s001.xlsx]

## Sheet: Ark1
ID	MEDS PR DAY	Living alone; 1=yes; 2=no	Weight loss 3 mths; 1=yes;2=no; 3=don't know	EQ-VAS adm	BORG set 1 hosp	BORG set 2 hosp	BORG set 3 hosp	Follow up - days after discharge	EQ-VAS home	Borg set 1 home	Borg set 2 home	Borg set 3 home	AGE	sex;1=male	Comorbidities; number	Adm diagnosis	CAS adm	CAS home	NMS14days prior	NMSadm	NMShome	use of gait devices; 0=yes; 1=no	Physical activity (PA)	PA level	OMC adm	OMC home	pain before demmi hosp	pain after demmi hosp	pain before demmi home	pain after demmi home	DEMMIadm	DEMMIhome	hosp pain shoulder before STAND	hosp pain back before STAND	hosp pain before STAND arms	hosp pain leg before STAND	hosp pain foot before STAND	hosp pain head before STAND	hosp pain stomac before STAND	hosp pain chest before STAND	hosp pain other before STAND	hosp pain total before STAND	home pain shoulder before STAND	home pain back before STAND	home pain before STAND arms	home pain leg before STAND	home pain foot before STAND	home pain head before STAND	home pain stomac before STAND
1	0	2	2	80	16	16	16	5	90	14	14	14	67	1	2	anemia	6	6	9	9	9	1	light PA > 4 timer	3	28	28	0	0	0	0	100	85	0	0	0	0	0	0	0	0	0	0	0	0	0	0	0	0	0
2	6	1	1	50	13	13							83	0	6	UTI	5		9	3		1	light PA > 4 timer	3	22		2	2			44		0	0	0	0	0	0	0	0	0	0
3	7	2	2	75	13	15		4	80	11	13	13	81	1	5	pneumonia	6	6	9	3	9	1	light PA > 4 timer	3	28	28	0	0	0	0	74	74	0	0	0	0	0	0	0	0	0	0	0	0	0	0	0	0	0
4	3	1	2	30	11	12	13	8	60	9	10	11	80	1	4	atr fib	6	6	7	7	2	0	less than 2 hours	1	26	28	0	0	0	0	48	48	0	0	0	0	0	0	0	0	0	0	0	0	0	0	0	0	0
5	5	1	2	50	15	15		8	50	15	16		85	0	4	pneumonia	6	6	9	9	2	1	2-4 hours	2	22	24	0	0	0	0	62	85	0	0	0	0	0	0	0	0	0	0	0	0	0	0	0	0	0
6	6	1	1	50									76	0	3	pneumonia	6		2	2		0			18
7	12	2	1	4	17	17		13	25	15	15	15	67	1	7	UTI	6	6	5	2	6	0	2-4 hours	2	28	26	10	10	8	7	48	48	2	3	2	0	0	3	0	0	0	10	1	2	0	2	2	0	0
8	1	2	2	80	9	9	11	14	85	10	11	12	77	1	2	atr fib	6	6	9	9	9	1	light PA > 4 timer	3	24	24	0	1	0	0	85	85	0	0	0	0	0	0	1	0	0	1	0	0	0	0	0	0	0
9	7	2	2	65	17	17		15	70	15	13	15	78	1	5	pneumonia	6	6	2	2	3	0	less than 2 hours	1	18	20	3	3	3	3	57	57	0	0	0	3	0	0	0	0	0	3	0	0	0	3	0	0	0
10	8	1	2	57	13	14		11	30	13	13		68	0	6	pneumonia	6	6	9	9	6	1	light PA > 4 timer	3	28	28	2	2	2	2	85	74	0	0	0	0	0	0	0	2	0	2	0	0	0	0	0	0	0
11	2	1	1	30	17	17		4	70	13	13		66	0	6	pulm embol	6	6	9	3	9	1	light PA > 4 timer	3	26	28	0	0	4	2	53	67	0	0	0	0	0	0	0	0	0	0	2	1	0	0	0	0	0
12	6	1	2	28	13	13	12	6	20	11	13	13	87	0	8	gastroenter	6	6	2	2	3	0	less than 2 hours	1	28	26	0	3	2	0	48	48	0	0	0	0	0	0	0	0	0	0	0	0	0	0	0	0	0
13	10	2	1	24	13			9	50	13	13		83	0	5	COPD	6	6	5	5	2	0	2-4 hours	2	26	26	0	0	0	2	41	62	0	0	0	0	0	0	0	0	0	0	0	0	0	0	0	0	0
14	2	1	1	75	13	15		9	85	11	15		79	1	5	pneumonia	6	6	9	3	9	1	light PA > 4 timer	3	20	28	0	0	0	0	74	74	0	0	0	0	0	0	0	0	0	0	0	0	0	0	0	0	0
15	7	1	2	60	15	16	16	6	100	15	15		75	0	5	pneumonia	6	6	6	2	3	1	light PA > 4 timer	3	26	28	0	0	0	0	74	85	0	0	0	0	0	0	0	0	0	0	0	0	0	0	0	0	0
16	3	2	3	90	17	17		17	88	17			90	1	5	pneumonia	6	6	7	7	7	0	light PA > 4 timer	3	17	24	0	2	0	3	67	62	0	0	0	0	0	0	0	0	0	0	0	0	0	2	0	0	0
17	13	1	1		15	15		30	100				88	1	4	pneumonia	6	6	9	2	7	1	light PA > 4 timer	3	11	22	0	0	0		62		0	0	0	0	0	0	0	0	0	0
18	8	1	1	30	15			6	50	13			70	0	6	pneumonia	6	6	5	2	5	0	2-4 hours	2	26	24	6	6	2	2	57	62	2	0	0	2	0	0	0	2	0	6	1	0	0	1	0	0	0
19	5	1	2	65	11			7	80	9	13		75	0	4	UTI	6	6	9	9	9	1	light PA > 4 timer	3	24	24	0	0	1	0	85	85	0	0	0	0	0	0	0	0	0	0	0	0	0	0	0	0	0
20	6	1	2	40	17	17		2	70	13	15		73	0	2	COPD	6	6	6	0	7	0	light PA > 4 timer	3	26	26	0	0	0	0	67	74	0	0	0	0	0	0	0	0	0	0	0	0	0	0	0	0	0
21	10	2	2	94	13	13		13	85	9	12		74	1	4	anamia	6	6	9	9	9	1	2-4 hours	2	26	24	0	0	0	0	74	100	0	0	0	0	0	0	0	0	0	0	0	0	0	0	0	0	0
22	1	2	2	85	11	11	16						86	1	3	dyspnea	6		9	9		1	less than 2 hours	1	24		0	0			74		0	0	0	0	0	0	0	0	0	0
23	1	2	2	80	9	12	13						78	0	5	pulm embol	6		9	9		1	light PA > 4 timer	3	28		0	0			74		0	0	0	0	0	0	0	0	0	0
24	7	2	1	60	13	13		13	60	17	15	17	70	1	3	atr fib	6	6	9	0	6	1	less than 2 hours	1	28	28	0	1	0	0	67	67	0	0	0	0	0	0	0	0	0	0	0	0	0	0	0	0	0
[truncated: 57 more columns]
