# Supplementary material for: Feasibility of progressive sit-to-stand training among older hospitalized patients
Source: PeerJ. 2015 Dec 17;3:e1500. doi: 10.7717/peerj.1500 (PMC4690357; doi:10.7717/peerj.1500)
Supplement: Supplemental Information 2 [file peerj-03-1500-s002.xlsx]

## Sheet: Ark1
ID	STAND	Time	Demmi	OMC
1	8	1	100	28
1	8	2	85	28
2	3	1	44	22
2	.	2	.	.
3	5	1	74	28
3	6	2	74	28
4	5	1	48	26
4	6	2	48	28
5	.	1	62	22
5	5	2	85	24
6	.	1	.	18
6	.	2	.	.
7	.	1	48	28
7	3	2	48	26
8	6	1	85	24
8	7	2	85	24
9	3	1	57	18
9	5	2	57	20
10	6	1	85	28
10	6	2	74	28
11	.	1	53	26
11	5	2	67	28
12	1	1	48	28
12	4	2	48	26
13	1	1	41	26
13	3	2	62	26
14	5	1	74	20
14	6	2	74	28
15	6	1	74	26
15	.	2	85	28
16	5	1	67	17
16	.	2	62	24
17	4	1	62	11
17	.	2	.	22
18	5	1	57	26
18	.	2	62	24
19	6	1	85	24
19	.	2	85	24
20	5	1	67	26
20	5	2	74	26
21	7	1	74	26
21	8	2	100	24
22	6	1	74	24
22	.	2	.	.
23	6	1	74	28
23	.	2	.	.
24	4	1	67	28
24	3	2	67	28
